# Supplementary material for: Skin Microbiomes of California Terrestrial Salamanders Are Influenced by Habitat More Than Host Phylogeny
Source: Front Microbiol. 2018 Mar 14;9:442. doi: 10.3389/fmicb.2018.00442 (PMC5861191; doi:10.3389/fmicb.2018.00442)
Supplement: Supplementary file 3 [file Table_3.XLSX]

## Sheet: Sheet1
Supplementary Table 3. Complete summary of R2 values from adonis analyses of Ensatina lower clade group pairwise comparisons for unweighted and weighted Unifrac distance data. R2 values are not listed for analyses resulting in p-values > 0.01. After Bonferoni correction, only p-values ≤0.001 (***) were considered significant.
Lower Clade Group 1	Lower Clade Group 2	Unweighted R2	Unweighted p-value	Weighted R2	Weighted p-value	Rarefaction Depth
Eschscholtzii	Klauberi	0.15755	0.001 ***	0.19898	0.001 ***	9466
Eschscholtzii	Oregonensis_1	0.10069	0.003 **	0.13271	0.011 *	17086
Eschscholtzii	Oregonensis_2	0.10078	0.001 ***	--	0.172	28738
Eschscholtzii	Oregonensis_3	0.11316	0.002 **	0.13228	0.009 **	13933
Eschscholtzii	Oregonensis_4	0.11365	0.013 *	0.20284	0.004 **	20482
Eschscholtzii	Southern_Platensis	--	0.073	0.24375	0.011 *	28738
Northern_Platensis	Oregonensis_2	0.1683	0.001 ***	0.23664	0.001 ***	16683
Northern_Platensis	Oregonensis_1	0.13087	0.009 **	0.16953	0.001 ***	16683
Northern_Platensis	Eschscholtzii	0.15971	0.001 ***	0.23874	0.001 ***	28738
Northern_Platensis	Oregonensis_3	0.15102	0.005 **	0.19037	0.002 **	13933
Northern_Platensis	Oregonensis_4	0.17987	0.01 **	--	0.148	16683
Northern_Platensis	Klauberi	0.10853	0.005 **	--	0.059	9466
Northern_Platensis	Southern_Platensis	--	0.23	--	0.129	16683
Oregonensis_1	Klauberi	0.1706	0.001 ***	0.16023	0.01 **	9466
Oregonensis_1	Oregonensis_3	0.10415	0.015 *	0.13843	0.023 *	13933
Oregonensis_1	Oregonensis_4	--	0.177	--	0.177	17086
Oregonensis_1	Southern_Platensis	--	0.126	--	0.093	17086
Oregonensis_2	Klauberi	0.18177	0.001 ***	0.17119	0.005 **	9466
Oregonensis_2	Oregonensis_1	--	0.143	--	0.07	17086
Oregonensis_2	Oregonensis_3	0.10548	0.005 **	--	0.057	13933
Oregonensis_2	Oregonensis_4	--	0.391	0.16953	0.003 **	20482
Oregonensis_2	Southern_Platensis	--	0.053	--	0.089	30990
Oregonensis_3	Klauberi	0.14331	0.002 **	--	0.188	9466
Oregonensis_3	Oregonensis_4	--	0.085	--	0.146	13933
Oregonensis_4	Klauberi	0.2117	0.001 ***	--	0.165	9466
Picta	Oregonensis_2	0.11559	0.009 **	0.20492	0.004 **	29784
Picta	Northern_Platensis	0.0957	0.021 *	0.16879	0.002 **	16683
Picta	Eschscholtzii	0.10022	0.002 **	0.21106	0.001 ***	28738
Picta	Klauberi	0.11739	0.001 ***	0.14155	0.014 *	9466
Picta	Oregonensis_1	0.08176	0.04 *	--	0.399	17086
Picta	Oregonensis_3	0.08583	0.022 *	0.14943	0.007 **	13933
Picta	Oregonensis_4	0.11672	0.05 *	0.15354	0.035 *	20482
Picta	Southern_Platensis	--	0.335	--	0.166	29784
Southern_Platensis	Klauberi	--	0.213	--	0.629	9466
Southern_Platensis	Oregonensis_3	--	0.217	--	0.461	13933
Southern_Platensis	Oregonensis_4	--	0.1333	--	0.4	20482
Xanthoptica_1	Oregonensis_2	0.17621	0.001 ***	0.1362	0.012 *	24911
Xanthoptica_1	Oregonensis_3	0.14161	0.001 ***	--	0.112	13933
Xanthoptica_1	Eschscholtzii	0.12407	0.001 ***	0.12109	0.021 *	24911
Xanthoptica_1	Oregonensis_4	0.17131	0.005 **	--	0.312	20482
Xanthoptica_1	Oregonensis_1	0.14648	0.001 ***	0.09914	0.05 *	17086
Xanthoptica_1	Klauberi	0.11135	0.001 ***	--	0.219	9466
Xanthoptica_1	Northern_Platensis	0.10446	0.006 **	--	0.062	16683
Xanthoptica_1	Picta	0.09244	0.006 **	--	0.054	24911
Xanthoptica_1	Southern_Platensis	--	0.266	--	0.535	24911
